# Supplementary material for: Loss-of-Function Mutations in PTPN11 Cause Metachondromatosis, but Not Ollier Disease or Maffucci Syndrome
Source: PubMed Central journal article supplement (PMC3077396; doi:10.1371/journal.pgen.1002050), 2011-04-14

**A**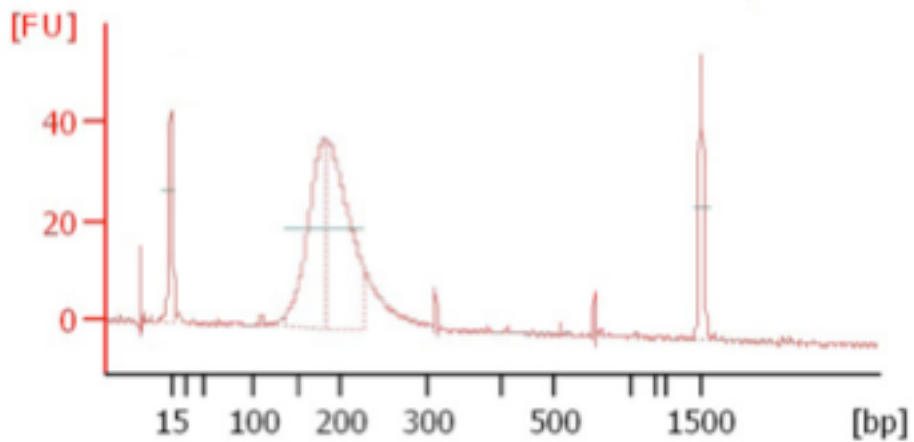**B**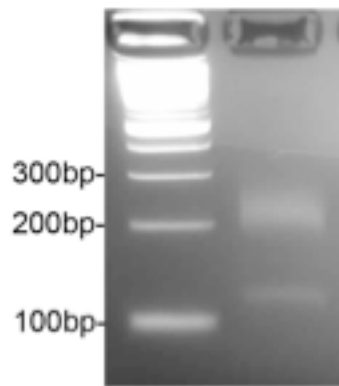

Supplement: pgen.1002050.s002.pdf [file pgen.1002050.s002.pdf]
