# Supplementary material for: Loss-of-Function Mutations in PTPN11 Cause Metachondromatosis, but Not Ollier Disease or Maffucci Syndrome
Source: PLOS journal article supplement (doi:10.1371/journal.pgen.1002050), 2011-04-14

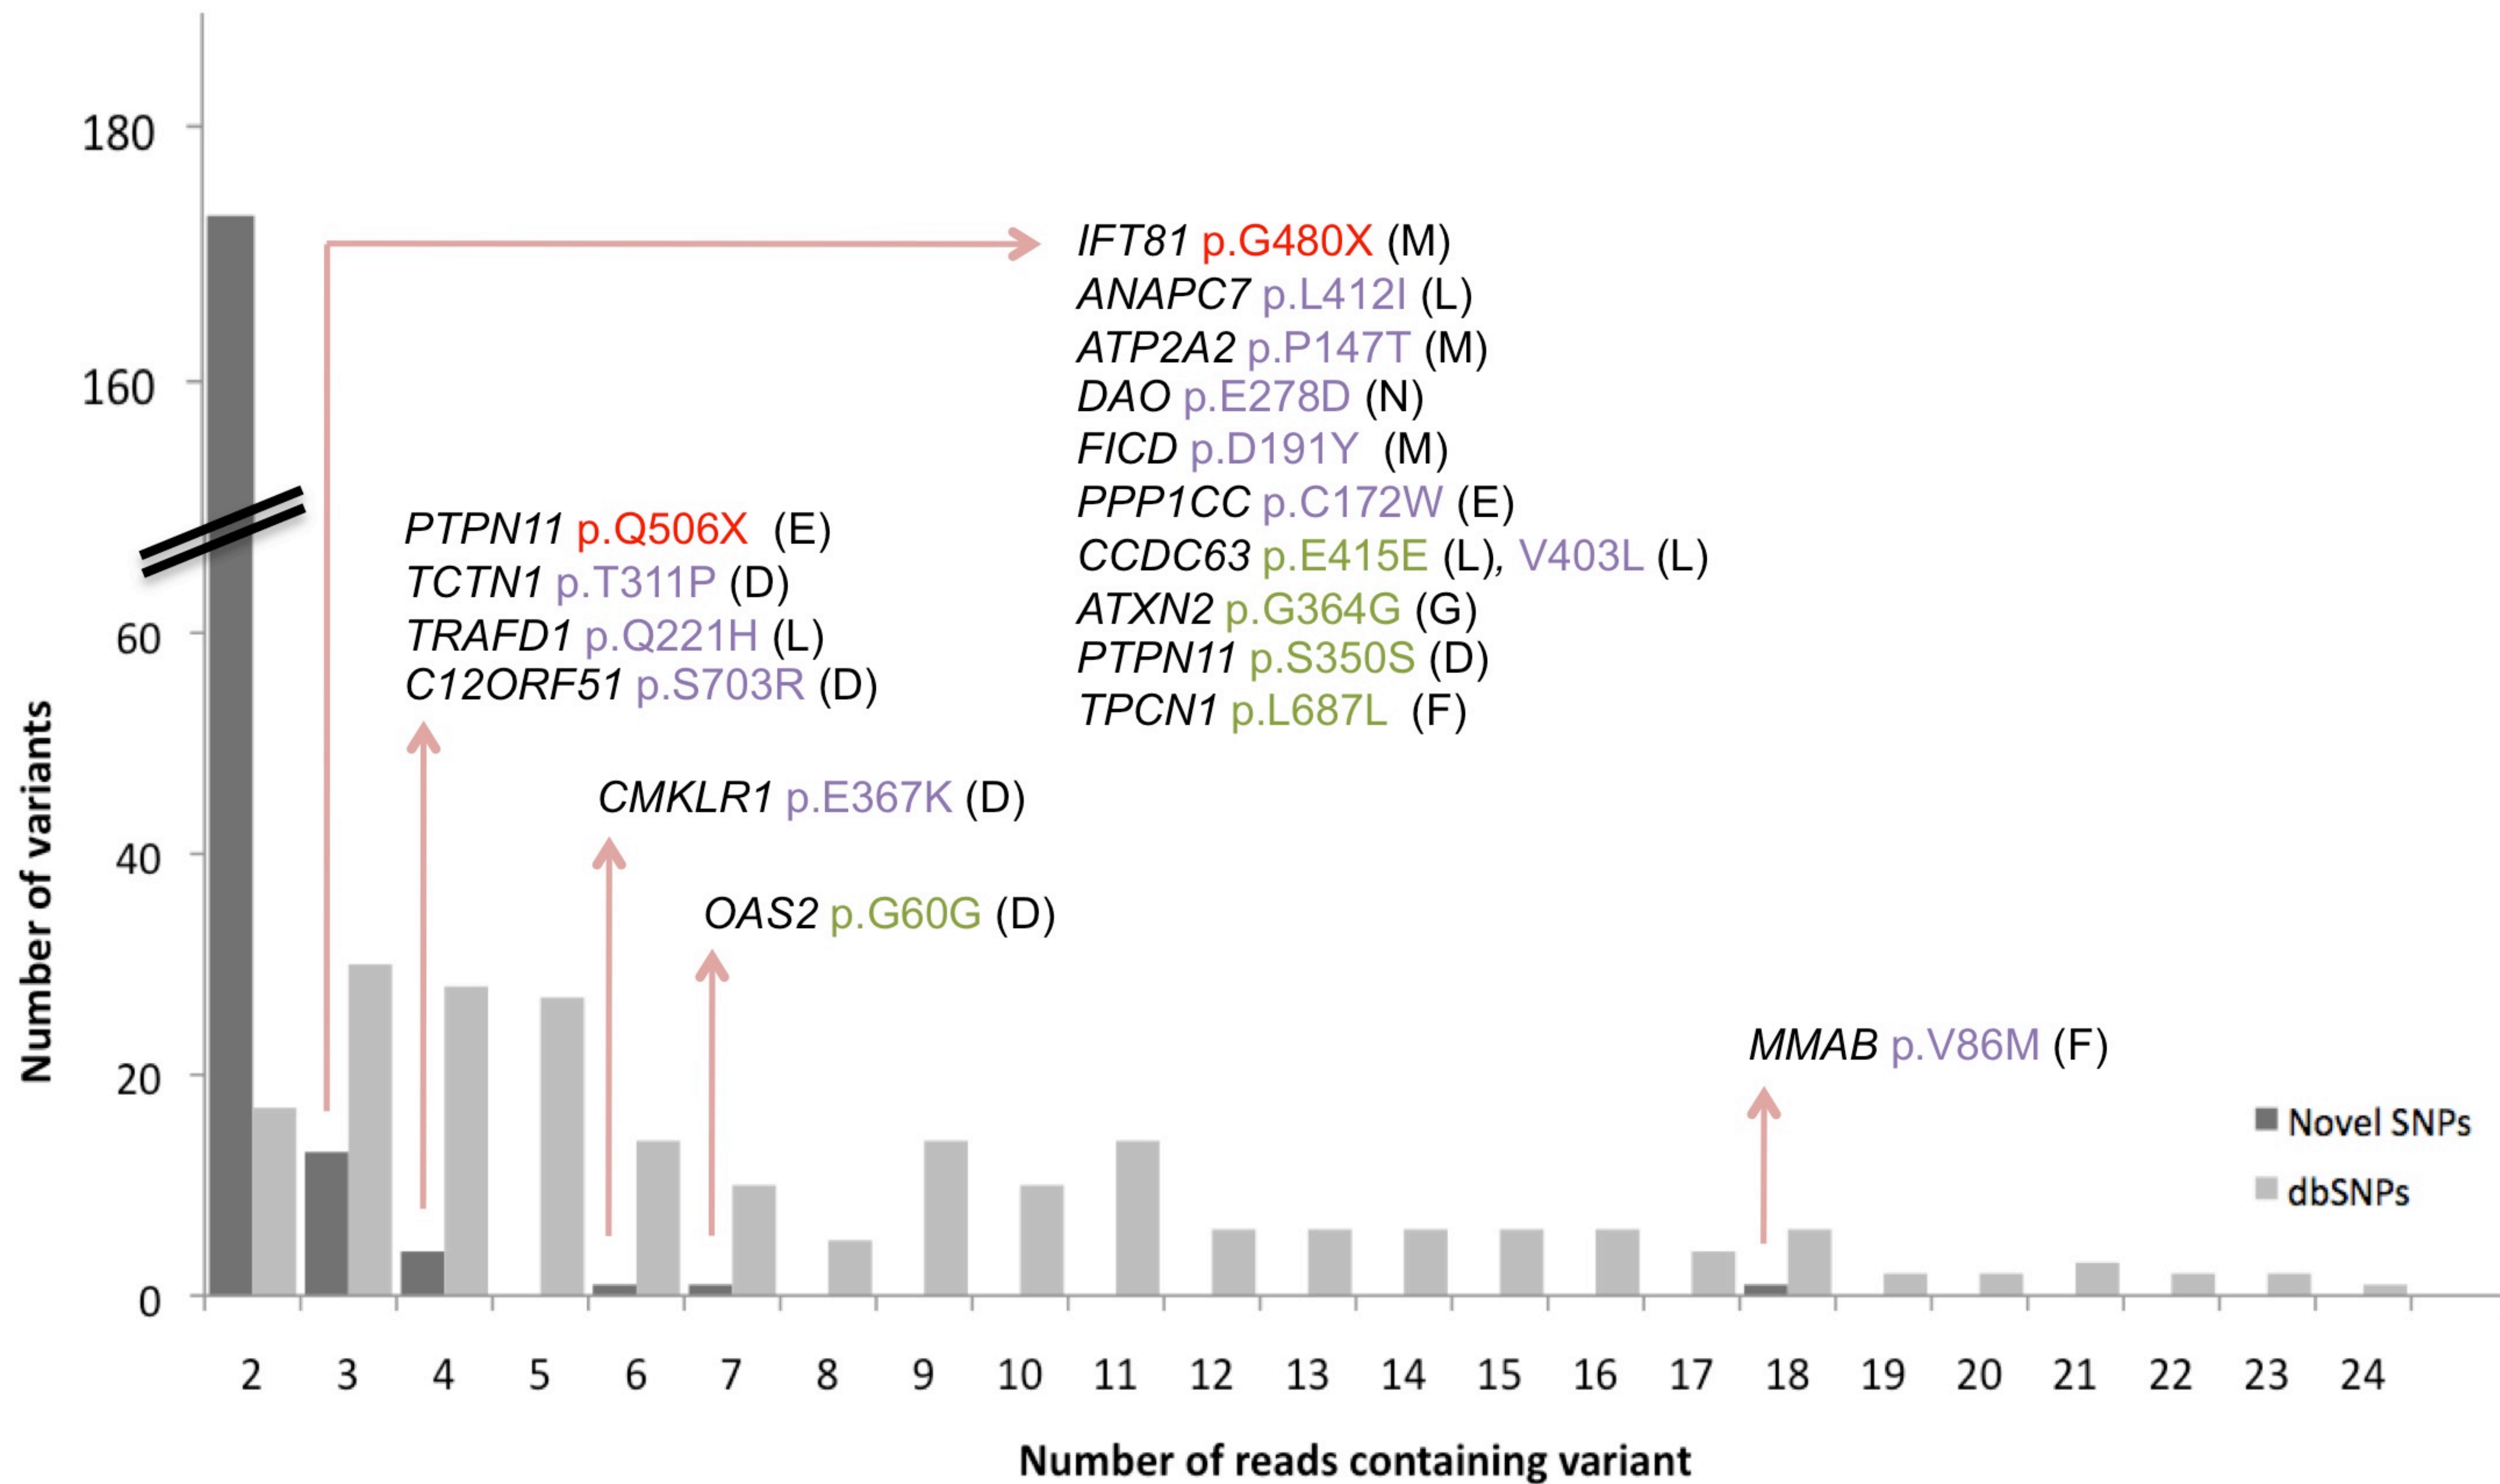

Supplement: S4 (10.1371/journal.pgen.1002050.s004) [file journal.pgen.1002050.s004]
